# Supplementary material for: MicroRNAs Involved in Regulatory Cytoplasmic Male Sterility by Analysis RNA-seq and Small RNA-seq in Soybean
Source: Front Genet. 2021 May 12;12:654146. doi: 10.3389/fgene.2021.654146 (PMC8153375; doi:10.3389/fgene.2021.654146)
Supplement: Supplementary Table 5 — Overview of the degradome sequences from JLCMS9A and JLCMS9B. [file Table_5.XLSX]

## Sheet: basicStatsAll
Table S5 Overview of degradome sequences from JLCMS9A and JLCMS9B
Sample	JLCMS9A(number)	JLCMS9B(number)	Sum(number)
Raw Reads	13604916	15876060	29480976
reads < 15nt after removing 3 adaptor	120004	134195	254199
Mappable Reads	13484912	15741865	29226777
Unique Raw Reads	4254173	5273395	7788400
Unique reads < 15nt after removing 3 adaptor	36370	44250	65627
Unique Mappable Reads	4217803	5229145	7722773
Transcript Mapped Reads	7959330	9352241	17311571
Unique Transcript Mapped Reads	2481724	3100602	4501890
Number of input Transcript	75188	75188	75188
Number of Coverd Transcript	63204	65437	66659
